# Supplementary material for: Histologic Analysis of Idiopathic Pulmonary Fibrosis by Morphometric and Fractal Analysis
Source: MDPI journal article supplement (doi:10.3390/biomedicines11051483), 2023-05-19
Supplement: s1 [file s1]

**Table S1.** Comparison between histologic and radiologic UIP subpattern.

| <b>Age</b> | <b>Histologic UIP pattern</b> | <b>Radiologic UIP pattern</b> |
|------------|-------------------------------|-------------------------------|
| 74         | UIP pattern                   | Probable UIP                  |
| 78         | UIP pattern                   | UIP pattern                   |
| 72         | UIP pattern                   | UIP pattern                   |
| 75         | Probable UIP                  | Probable UIP                  |
| 68         | UIP pattern                   | UIP pattern                   |
| 79         | Probable UIP                  | Probable UIP                  |
| 80         | Probable UIP                  | Indeterminate for UIP         |
| 74         | UIP pattern                   | UIP pattern                   |
| 64         | Probable UIP                  | Probable UIP                  |
| 72         | Indeterminate for UIP         | Probable UIP                  |
| 67         | Indeterminate for UIP         | Probable UIP                  |
| 78         | Indeterminate for UIP         | Probable UIP                  |
